# Supplementary material for: A homeostatic mechanism rapidly corrects aberrant nucleocytoplasmic ratios maintaining nuclear size in fission yeast
Source: Oxford University Press journal article supplement (doi:10.1242/jcs.235911), 2019-10-24
Supplement: jcs235911supp.pdf [file jcs235911supp.pdf]

**Table S1:** Fission yeast strains used in this study.

| Strain  | Species             | Genotype                                              | Origin              |
|---------|---------------------|-------------------------------------------------------|---------------------|
| PN3779  | <i>S. pombe</i>     | <i>cut11-GFP::ura4+ leu1-32 ura4-D18 h+</i>           | Lab collection      |
| PN3803  | <i>S. pombe</i>     | <i>cdc11-119 cut11-GFP::ura4+ leu1-32 ura4-D18 h-</i> | Lab collection      |
| NIG8181 | <i>S. japonicus</i> | <i>mat6j-2017 cut11-GFP::natR h+</i>                  | (Aoki et al., 2011) |
| PN10423 | <i>S. pombe</i>     | <i>pom1Δ::ura4+ cut11-GFP::ura4+ h-</i>               | Lab collection      |

Aoki, K., Hayashi, H., Furuya, K., Sato, M., Takagi, T., Osumi, M., Kimura, A. and Niki, H. (2011). Breakage of the nuclear envelope by an extending mitotic nucleus occurs during anaphase in *Schizosaccharomyces japonicus*. *Genes Cells* 16, 911-926. doi:10.1111/j.1365-2443.2011.01540.x

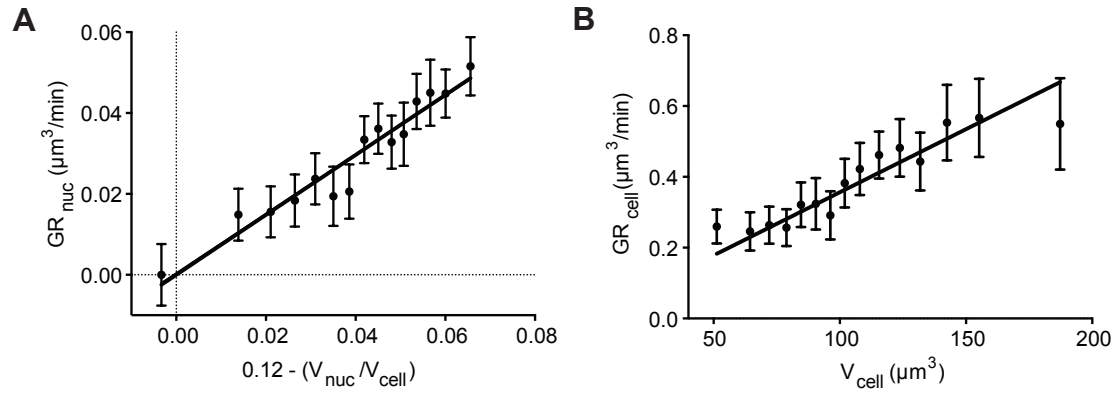

**Figure S1:** Data derived from *pom1* $\Delta$  dataset in Fig. 4. (A) Mean nuclear growth rate ( $GR_{nuc}$ ) cohorted by  $\left(0.12 - \frac{V_{nuc}}{V_{cell}}\right)$ . (B) Mean cellular growth rate ( $GR_{cell}$ ) cohorted by cell volume ( $V_{cell}$ ). 95% confidence limits (15 cohorts,  $\geq 100$  time bins per cohort) and linear regression lines shown.
